# Supplementary material for: The incidence and prevalence of systemic lupus erythematosus in the UK, 1999–2012
Source: PubMed Central journal article supplement — Ann Rheum Dis. 2014 Sep 29;75(1):136–41. doi: 10.1136/annrheumdis-2014-206334 (PMC4717400; doi:10.1136/annrheumdis-2014-206334), 2014-09-29
Supplement: annrheumdis-2014-206334-s1.pdf [file annrheumdis-2014-206334-s1.pdf]

**Table S1: Read codes selected for SLE case definitions**

| <b>Read code</b> | <b>Description</b>                                            |
|------------------|---------------------------------------------------------------|
| N000.00          | Systemic lupus erythematosus                                  |
| N000000          | Disseminated lupus erythematosus                              |
| N000100          | Libman-Sacks disease                                          |
| N000300          | Systemic lupus erythematosus with organ or system involvement |
| N000400          | Systemic lupus erythematosus with pericarditis                |
| N000600          | Cerebral lupus                                                |
| N000z00          | Systemic lupus erythematosus NOS                              |
| Nyu4300          | [X]Other forms of systemic lupus erythematosus                |
| M154.00          | Lupus erythematosus                                           |
| M154000          | Lupus erythematosus chronicus*                                |
| M154100          | Discoid lupus erythematosus*                                  |
| M154200          | Lupus erythematosus migrans*                                  |
| M154300          | Lupus erythematosus nodularis*                                |
| M154400          | Lupus erythematosus profundus*                                |
| M154500          | Lupus erythematosus tumidus*                                  |
| M154600          | Lupus erythematosus unguium mutilans*                         |
| M154700          | Subacute cutaneous lupus erythematosus*                       |
| M154z00          | Lupus erythematosus NOS                                       |
| Myu7800          | [X]Other local lupus erythematosus*                           |
| F371000          | Polyneuropathy in disseminated lupus erythematosus            |
| F4D3300          | Eyelid discoid lupus erythematosus*                           |
| H57y400          | Lung disease with systemic lupus erythematosus                |
| K01x400          | Nephrotic syndrome in systemic lupus erythematosus            |
| K01x411          | Lupus nephritis                                               |

\*=cutaneous variants of SLE included in definition 2.

Table S2 Comparative incidence and prevalence by SLE definition

|                |                        | Definition 1-“Systemic lupus”                     |        |       | Definition 2-“Lupus” |        |        | Definition 3-“Lupus plus indicator” |        |       |
|----------------|------------------------|---------------------------------------------------|--------|-------|----------------------|--------|--------|-------------------------------------|--------|-------|
|                |                        | Incidence rate, per 100,000 person-years (95% CI) |        |       |                      |        |        |                                     |        |       |
| <b>Overall</b> |                        | 4.91                                              | (4.73, | 5.09) | 6.23                 | (6.03, | 6.44)  | 4.58                                | (4.40, | 4.76) |
| <b>Year*</b>   | 1999                   | 5.10                                              | (4.25, | 5.96) | 5.97                 | (5.05, | 6.90)  | 4.41                                | (3.61, | 5.20) |
|                | 2000                   | 5.87                                              | (5.03, | 6.71) | 7.14                 | (6.21, | 8.06)  | 4.97                                | (4.20, | 5.74) |
|                | 2001                   | 5.30                                              | (4.54, | 6.06) | 6.62                 | (5.77, | 7.47)  | 4.82                                | (4.09, | 5.54) |
|                | 2002                   | 5.82                                              | (5.06, | 6.59) | 7.15                 | (6.30, | 8.00)  | 5.06                                | (4.34, | 5.77) |
|                | 2003                   | 5.19                                              | (4.49, | 5.90) | 6.62                 | (5.82, | 7.42)  | 4.69                                | (4.02, | 5.36) |
|                | 2004                   | 4.34                                              | (3.71, | 4.98) | 6.17                 | (5.41, | 6.92)  | 4.30                                | (3.66, | 4.93) |
|                | 2005                   | 5.54                                              | (4.84, | 6.25) | 6.59                 | (5.82, | 7.36)  | 4.74                                | (4.09, | 5.39) |
|                | 2006                   | 4.13                                              | (3.53, | 4.74) | 5.60                 | (4.90, | 6.31)  | 4.41                                | (3.78, | 5.03) |
|                | 2007                   | 4.85                                              | (4.20, | 5.51) | 6.12                 | (5.39, | 6.85)  | 4.56                                | (3.93, | 5.20) |
|                | 2008                   | 4.87                                              | (4.22, | 5.53) | 6.26                 | (5.51, | 7.00)  | 4.90                                | (4.25, | 5.56) |
|                | 2009                   | 4.42                                              | (3.80, | 5.05) | 5.71                 | (5.00, | 6.41)  | 4.40                                | (3.78, | 5.02) |
|                | 2010                   | 4.03                                              | (3.43, | 4.63) | 5.51                 | (4.81, | 6.21)  | 4.07                                | (3.47, | 4.67) |
|                | 2011                   | 4.92                                              | (4.26, | 5.59) | 6.20                 | (5.45, | 6.95)  | 4.67                                | (4.02, | 5.32) |
|                | 2012                   | 4.64                                              | (3.98, | 5.31) | 5.74                 | (5.00, | 6.48)  | 4.05                                | (3.43, | 4.67) |
| <b>Gender</b>  | Female                 | 8.34                                              | (8.01, | 8.69) | 10.17                | (9.81, | 10.55) | 7.83                                | (7.51, | 8.16) |
|                | Male                   | 1.44                                              | (1.30, | 1.58) | 2.25                 | (2.08, | 2.43)  | 1.30                                | (1.17, | 1.44) |
| <b>Age</b>     | 0-9                    | 0.19                                              | (0.11, | 0.35) | 0.28                 | (0.17, | 0.46)  | 0.16                                | (0.08, | 0.30) |
|                | 10-19                  | 1.92                                              | (1.62, | 2.29) | 2.17                 | (1.84, | 2.55)  | 1.76                                | (1.46, | 2.11) |
|                | 20-29                  | 3.65                                              | (3.21, | 4.16) | 4.48                 | (3.99, | 5.04)  | 3.41                                | (2.99, | 3.90) |
|                | 30-39                  | 5.89                                              | (5.38, | 6.44) | 7.20                 | (6.64, | 7.81)  | 5.43                                | (4.94, | 5.96) |
|                | 40-49                  | 7.22                                              | (6.67, | 7.81) | 8.98                 | (8.37, | 9.64)  | 6.90                                | (6.37, | 7.48) |
|                | 50-59                  | 7.39                                              | (6.81, | 8.03) | 9.16                 | (8.51, | 9.87)  | 6.77                                | (6.21, | 7.38) |
|                | 60-69                  | 6.20                                              | (5.60, | 6.86) | 8.35                 | (7.65, | 9.11)  | 5.99                                | (5.40, | 6.64) |
|                | 70-79                  | 6.17                                              | (5.47, | 6.96) | 8.27                 | (7.45, | 9.17)  | 5.80                                | (5.12, | 6.56) |
|                | 80-89                  | 3.21                                              | (2.54, | 4.05) | 5.38                 | (4.49, | 6.44)  | 2.71                                | (2.11, | 3.49) |
|                | 90+                    | 1.42                                              | (0.64, | 3.17) | 3.08                 | (1.79, | 5.31)  | 0.47                                | (0.12, | 1.90) |
| <b>Region*</b> | North East             | 4.55                                              | (3.28, | 5.83) | 4.94                 | (3.61, | 6.27)  | 3.73                                | (2.57, | 4.88) |
|                | North West             | 4.75                                              | (4.24, | 5.26) | 6.67                 | (6.07, | 7.28)  | 4.86                                | (4.34, | 5.37) |
|                | Yorkshire & The Humber | 4.28                                              | (3.40, | 5.16) | 5.33                 | (4.35, | 6.31)  | 3.87                                | (3.03, | 4.70) |
|                | East Midlands          | 4.53                                              | (3.65, | 5.40) | 6.12                 | (5.10, | 7.14)  | 4.35                                | (3.49, | 5.21) |
|                | West Midlands          | 3.87                                              | (3.31, | 4.43) | 5.08                 | (4.44, | 5.72)  | 3.50                                | (2.96, | 4.03) |
|                | East of England        | 6.03                                              | (5.36, | 6.69) | 7.18                 | (6.46, | 7.91)  | 5.39                                | (4.76, | 6.02) |
|                | South West             | 4.57                                              | (3.92, | 5.21) | 5.70                 | (4.98, | 6.42)  | 4.20                                | (3.58, | 4.82) |
|                | South Central          | 4.23                                              | (3.72, | 4.74) | 5.09                 | (4.53, | 5.64)  | 4.00                                | (3.50, | 4.49) |
|                | London                 | 5.98                                              | (5.34, | 6.62) | 7.36                 | (6.65, | 8.07)  | 5.13                                | (4.54, | 5.72) |
|                | South East Coast       | 4.73                                              | (4.12, | 5.35) | 6.04                 | (5.34, | 6.74)  | 4.48                                | (3.88, | 5.08) |
|                | Northern Ireland       | 5.79                                              | (4.70, | 6.88) | 6.53                 | (5.38, | 7.69)  | 4.95                                | (3.94, | 5.96) |
|                | Scotland               | 5.32                                              | (4.71, | 5.94) | 6.96                 | (6.26, | 7.66)  | 4.99                                | (4.40, | 5.59) |
|                | Wales                  | 4.58                                              | (3.98, | 5.18) | 6.21                 | (5.51, | 6.91)  | 4.76                                | (4.15, | 5.37) |

| <b>Ethnicity</b> | Bangladeshi     | 0.00  | .       | .      | 3.06  | (0.43,  | 21.73) | 0.00  | .       | .      |
|------------------|-----------------|-------|---------|--------|-------|---------|--------|-------|---------|--------|
|                  | Black African   | 13.78 | (8.31,  | 22.85) | 16.53 | (10.42, | 26.24) | 14.70 | (9.00,  | 23.99) |
|                  | Black Caribbean | 31.46 | (22.48, | 44.03) | 37.04 | (27.17, | 50.50) | 30.56 | (21.73, | 42.99) |
|                  | Black Other     | 22.25 | (12.64, | 39.19) | 24.12 | (14.01, | 41.55) | 18.56 | (9.98,  | 34.49) |
|                  | Chinese         | 9.35  | (3.51,  | 24.91) | 11.69 | (4.87,  | 28.09) | 7.01  | (2.26,  | 21.75) |
|                  | Indian          | 9.90  | (6.32,  | 15.53) | 11.47 | (7.55,  | 17.42) | 8.86  | (5.51,  | 14.26) |
|                  | Mixed           | 11.67 | (6.63,  | 20.55) | 10.70 | (5.93,  | 19.32) | 9.73  | (5.23,  | 18.08) |
|                  | Other Asian     | 17.45 | (10.34, | 29.46) | 19.95 | (12.22, | 32.56) | 14.96 | (8.50,  | 26.34) |
|                  | Other           | 5.48  | (3.18,  | 9.44)  | 6.33  | (3.81,  | 10.49) | 4.22  | (2.27,  | 7.84)  |
|                  | Pakistani       | 9.95  | (5.51,  | 17.96) | 18.10 | (11.67, | 28.05) | 9.95  | (5.51,  | 17.97) |
|                  | Unknown         | 4.71  | (4.14,  | 5.37)  | 6.26  | (5.59,  | 7.00)  | 4.59  | (4.03,  | 5.24)  |
|                  | White           | 6.73  | (6.35,  | 7.14)  | 8.41  | (7.98,  | 8.87)  | 6.34  | (5.96,  | 6.74)  |
|                  | Unclassified    | 1.50  | (1.30,  | 1.73)  | 2.06  | (1.82,  | 2.33)  | 1.29  | (1.10,  | 1.50)  |

**Point prevalence, per 100,000 (95% CI)**

| <b>Year*</b>              | 1999   | 64.99  | (62.04,  | 67.93)  | 84.83  | (81.46,  | 88.20)  | 54.96  | (52.25,  | 57.68)  |
|---------------------------|--------|--------|----------|---------|--------|----------|---------|--------|----------|---------|
|                           | 2000   | 66.60  | (63.87,  | 69.33)  | 86.24  | (83.13,  | 89.35)  | 56.25  | (53.75,  | 58.76)  |
|                           | 2001   | 69.97  | (67.30,  | 72.63)  | 90.86  | (87.82,  | 93.90)  | 59.65  | (57.18,  | 62.11)  |
|                           | 2002   | 73.77  | (71.15,  | 76.38)  | 96.09  | (93.10,  | 99.08)  | 63.71  | (61.28,  | 66.15)  |
|                           | 2003   | 76.99  | (74.36,  | 79.61)  | 100.22 | (97.23,  | 103.22) | 66.71  | (64.27,  | 69.15)  |
|                           | 2004   | 78.04  | (75.46,  | 80.62)  | 102.13 | (99.18,  | 105.09) | 68.44  | (66.02,  | 70.85)  |
|                           | 2005   | 81.26  | (78.66,  | 83.86)  | 106.52 | (103.55, | 109.50) | 71.79  | (69.35,  | 74.23)  |
|                           | 2006   | 84.39  | (81.74,  | 87.05)  | 110.93 | (107.88, | 113.97) | 74.80  | (72.30,  | 77.30)  |
|                           | 2007   | 87.18  | (84.49,  | 89.86)  | 113.99 | (110.92, | 117.07) | 78.39  | (75.84,  | 80.93)  |
|                           | 2008   | 88.61  | (85.93,  | 91.29)  | 115.72 | (112.65, | 118.78) | 80.61  | (78.05,  | 83.16)  |
|                           | 2009   | 91.17  | (88.46,  | 93.89)  | 118.86 | (115.76, | 121.96) | 83.22  | (80.62,  | 85.81)  |
|                           | 2010   | 94.61  | (91.80,  | 97.43)  | 122.32 | (119.12, | 125.52) | 86.19  | (83.50,  | 88.87)  |
|                           | 2011   | 96.67  | (93.81,  | 99.53)  | 125.51 | (122.25, | 128.77) | 87.80  | (85.08,  | 90.52)  |
|                           | 2012   | 97.04  | (94.18,  | 99.90)  | 125.51 | (122.26, | 128.76) | 88.09  | (85.36,  | 90.81)  |
| <b>Gender<br/>in 2012</b> | Female | 167.62 | (162.37, | 173.00) | 206.63 | (200.79, | 212.59) | 152.45 | (147.44, | 157.58) |
|                           | Male   | 24.82  | (22.81,  | 26.97)  | 42.53  | (39.87,  | 45.31)  | 22.24  | (20.34,  | 24.28)  |
| <b>Age<br/>in 2012</b>    | 0-9    | 1.72   | (0.79,   | 3.26)   | 2.10   | (1.05,   | 3.76)   | 0.76   | (0.02,   | 1.96)   |
|                           | 10-19  | 13.36  | (10.35,  | 16.96)  | 14.95  | (11.76,  | 18.74)  | 10.97  | (8.26,   | 14.27)  |
|                           | 20-29  | 35.43  | (30.73,  | 40.64)  | 39.94  | (34.95,  | 45.45)  | 30.91  | (26.54,  | 35.62)  |
|                           | 30-39  | 80.62  | (73.60,  | 88.13)  | 94.58  | (86.97,  | 102.68) | 67.66  | (61.24,  | 74.56)  |
|                           | 40-49  | 127.90 | (119.57, | 136.65) | 160.89 | (151.53, | 170.68) | 117.24 | (109.27, | 125.64) |
|                           | 50-59  | 166.47 | (156.22, | 177.22) | 210.55 | (199.00, | 222.59) | 153.42 | (143.58, | 163.75) |
|                           | 60-69  | 179.74 | (168.30, | 191.74) | 242.32 | (229.02, | 256.20) | 168.98 | (157.90, | 180.63) |
|                           | 70-79  | 173.99 | (160.07, | 188.80) | 242.27 | (225.79, | 259.63) | 162.22 | (148.78, | 176.53) |
|                           | 80-89  | 137.46 | (121.08, | 155.45) | 203.49 | (183.44, | 225.14) | 119.07 | (103.85, | 134.88) |
|                           | 90+    | 95.01  | (68.18,  | 128.89) | 143.68 | (110.16, | 184.19) | 76.47  | (52.64,  | 104.40) |

|                              |                        |        |          |         |        |          |         |        |          |         |
|------------------------------|------------------------|--------|----------|---------|--------|----------|---------|--------|----------|---------|
| <b>Region<br/>in 2012</b>    | North East             | 99.52  | (78.79,  | 124.03) | 138.57 | (113.89, | 167.01) | 90.70  | (70.97,  | 114.22) |
|                              | North West             | 102.22 | (93.98,  | 110.98) | 137.13 | (127.57, | 147.23) | 95.74  | (87.78,  | 104.23) |
|                              | Yorkshire & The Humber | 99.09  | (78.20,  | 123.84) | 126.11 | (102.38, | 153.69) | 88.79  | (69.09,  | 112.37) |
|                              | East Midlands          | 65.16  | (48.52,  | 85.68)  | 100.94 | (79.92,  | 125.80) | 67.72  | (50.73,  | 88.58)  |
|                              | West Midlands          | 75.03  | (66.53,  | 84.32)  | 102.97 | (92.97,  | 113.76) | 68.91  | (60.78,  | 77.84)  |
|                              | East of England        | 117.42 | (106.07, | 129.65) | 139.64 | (127.24, | 152.93) | 104.21 | (93.53,  | 115.77) |
|                              | South West             | 86.45  | (77.21,  | 96.50)  | 112.28 | (101.71, | 123.65) | 78.30  | (69.51,  | 87.88)  |
|                              | South Central          | 85.34  | (77.90,  | 93.30)  | 109.72 | (101.26, | 118.70) | 79.86  | (72.67,  | 87.58)  |
|                              | London                 | 118.14 | (109.48, | 127.31) | 141.84 | (132.33, | 151.86) | 100.29 | (92.32,  | 108.76) |
|                              | South East Coast       | 92.01  | (83.33,  | 101.35) | 114.63 | (104.91, | 125.00) | 86.42  | (78.01,  | 95.48)  |
|                              | Northern Ireland       | 120.12 | (103.39, | 138.78) | 137.74 | (119.78, | 157.63) | 102.49 | (87.09,  | 119.84) |
|                              | Scotland               | 108.15 | (99.18,  | 117.70) | 149.51 | (138.94, | 160.67) | 96.65  | (88.18,  | 105.70) |
|                              | Wales                  | 79.07  | (70.95,  | 87.87)  | 110.70 | (101.05, | 121.03) | 75.18  | (67.26,  | 83.77)  |
| <b>Ethnicity<br/>in 2012</b> | Bangladeshi            | 80.27  | (21.87,  | 205.53) | 100.34 | (32.58,  | 234.16) | 60.20  | (124.20, | 175.94) |
|                              | Black African          | 179.81 | (125.24, | 250.07) | 195.22 | (138.15, | 267.96) | 164.40 | (112.45, | 232.08) |
|                              | Black Caribbean        | 517.51 | (398.54, | 660.84) | 606.45 | (477.01, | 760.19) | 525.59 | (405.64, | 669.91) |
|                              | Black Other            | 345.53 | (231.40, | 496.23) | 405.10 | (280.54, | 566.09) | 285.95 | (183.22, | 425.47) |
|                              | Chinese                | 188.39 | (90.34,  | 346.46) | 226.07 | (116.82, | 394.91) | 188.39 | (90.34,  | 346.46) |
|                              | Indian                 | 193.09 | (140.84, | 258.37) | 218.84 | (162.94, | 287.73) | 167.35 | (119.00, | 228.77) |
|                              | Mixed                  | 138.15 | (88.52,  | 205.56) | 149.67 | (97.77,  | 219.30) | 132.40 | (83.93,  | 198.66) |
|                              | Other Asian            | 178.79 | (113.34, | 268.28) | 202.11 | (132.03, | 296.14) | 139.93 | (82.93,  | 221.14) |
|                              | Other                  | 143.26 | (102.35, | 195.08) | 175.50 | (129.83, | 232.01) | 132.52 | (93.30,  | 182.66) |
|                              | Pakistani              | 142.79 | (91.49,  | 212.46) | 202.28 | (140.09, | 282.67) | 130.89 | (82.03,  | 198.17) |
|                              | Unknown                | 89.36  | (80.19,  | 99.29)  | 126.04 | (115.10, | 137.73) | 86.78  | (77.75,  | 96.57)  |
|                              | White                  | 134.53 | (128.21, | 141.08) | 166.74 | (159.70, | 174.02) | 123.77 | (117.71, | 130.06) |
|                              | Unclassified           | 34.84  | (31.30,  | 38.67)  | 48.55  | (44.36,  | 53.04)  | 28.12  | (24.95,  | 31.59)  |

\* adjusted for age and gender
